# Supplementary material for: Kinetic analysis of hexose conversion to methyl lactate by Sn-Beta: effects of substrate masking and of water
Source: Royal Society of Chemistry journal article supplement (doi:10.1039/c8cy00335a), 2018-01-01
Supplement: c8cy00335a1.pdf [file c8cy00335a1.pdf]

**Kinetic Analysis of Hexose Conversion to Methyl Lactate by Sn Beta:  
Effects of Substrate Masking and of Water**

Irene Tosi, Anders Riisager,<sup>\*</sup> Esben Taarning, Pernille Rose Jensen and Sebastian Meier<sup>a\*</sup>

# **Supporting Information**

## Catalysts characterization

### X-Ray Powder Diffraction (XRPD)

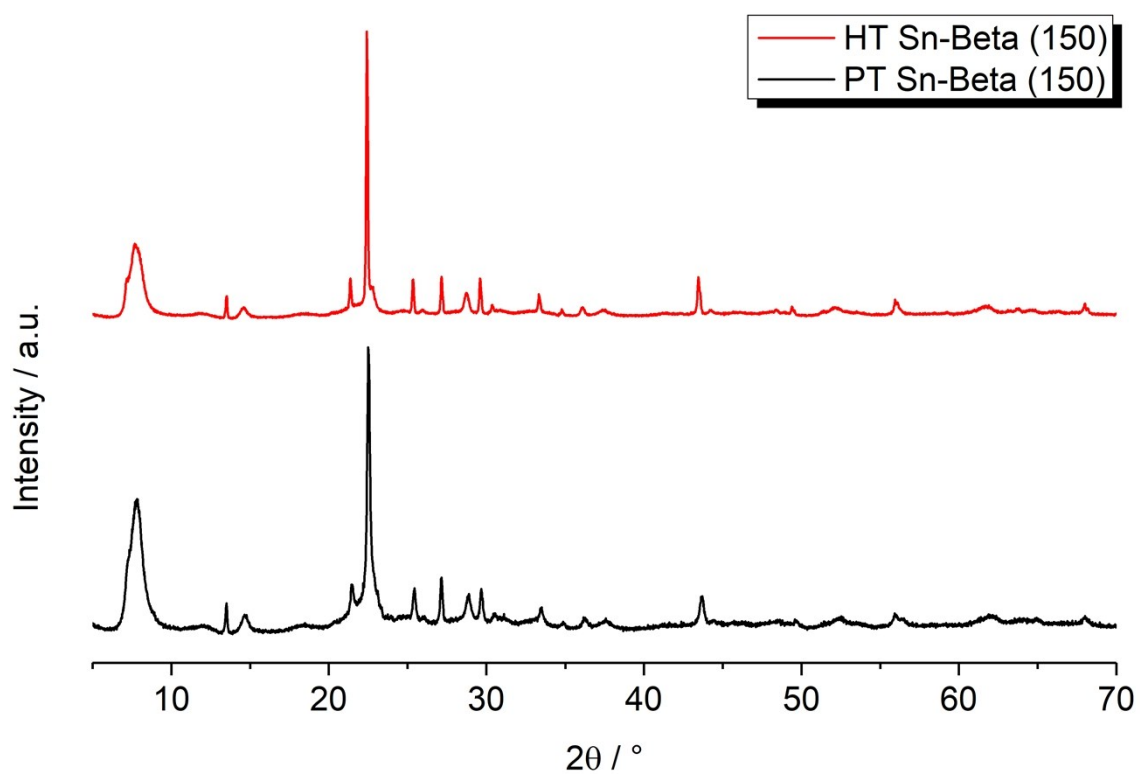

**Figure S1-** XRD patterns of the hydrothermal synthesized Sn-Beta (150) (red) and the post treated Sn-Beta (150) (black). The data are consistent with the reference \*BEA crystal structure.

### NH<sub>3</sub>-Temperature Programmed Desorption (TPD)

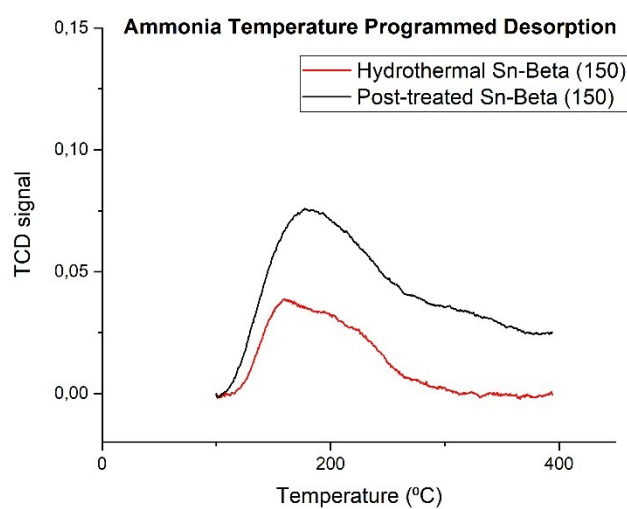

**Figure S2-** NH<sub>3</sub>-TPD profiles of the hydrothermal (red) and post-treated (black) Sn-Beta (150) zeolites.

**Table S1-** Physicochemical properties of the hydrothermal and post-treated Sn-Beta (150) zeolites.

|                                                      | Hydrothermal Sn-Beta (150) | Post-treated Sn-Beta (150) |
|------------------------------------------------------|----------------------------|----------------------------|
| <b>Cristallinity (%)<sup>a</sup></b>                 | 93,66                      | 59,60                      |
| <b>Sn (wt %)<sup>b</sup></b>                         | 1,189                      | 0,977                      |
| <b>Si/Sn<sup>b</sup></b>                             | 130,36                     | 152,8001                   |
| <b>S<sub>BET</sub> (m<sup>2</sup>/g)<sup>c</sup></b> | 602                        | 722                        |
| <b>V<sub>micropore</sub> (mL/g)<sup>d</sup></b>      | 0,24                       | 0,30                       |
| <b>Total acid sites (mmol/g)<sup>e</sup></b>         | 5,57                       | 10,84                      |

a. XRD measurements

b. ICP analysis

c. BET surface area

d. Micropore volume

e. NH<sub>3</sub>-TPD analysis

### HT Sn-Beta

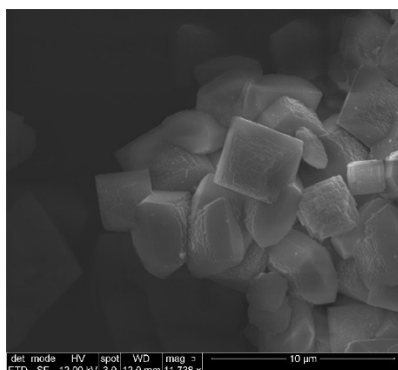

### PT Sn-Beta

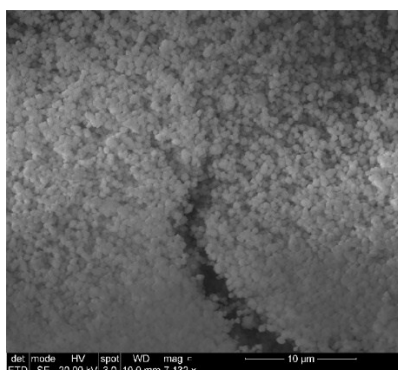

**Fig. S3** Scanning electron microscope pictures of HT Sn-Beta (top) and PT Sn-Beta (bottom). The hydrothermal synthesis results in a large-crystal, defect-free material.

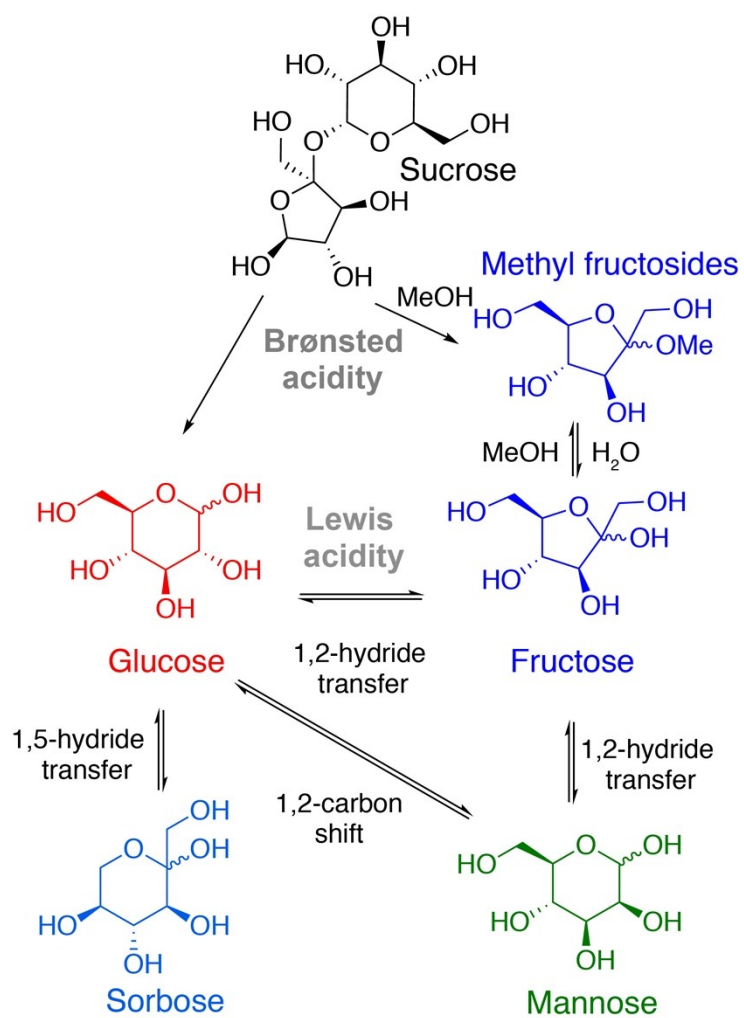

**Fig. S4** Schematic overview of Sn-Beta catalyzed interconversions of carbohydrates. Only one isomer is displayed per monosaccharide for clarity. Glycosides of glucose, sorbose and mannose formed due to reaction with methanol are omitted for clarity.

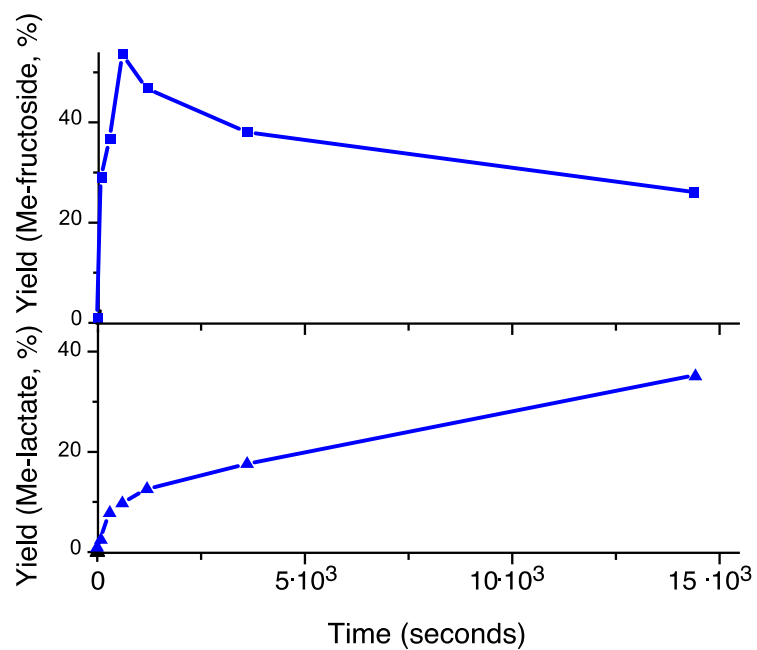

**Fig. S5** Yields of methyl fructoside and methyl lactate in time resolved experiments starting from sucrose. Conditions: 108 mg substrate, 50 mg HT Sn-beta (150) catalyst, MW reactor for the indicated time at 160 °C.

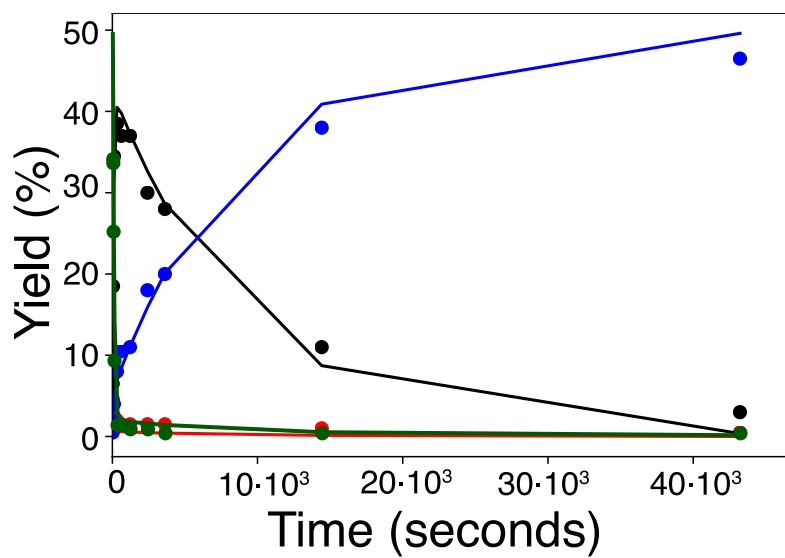

**Fig. S6** Fit of experimental data to the kinetic model of main text Fig. 6 displayed on a linear time scale axis.

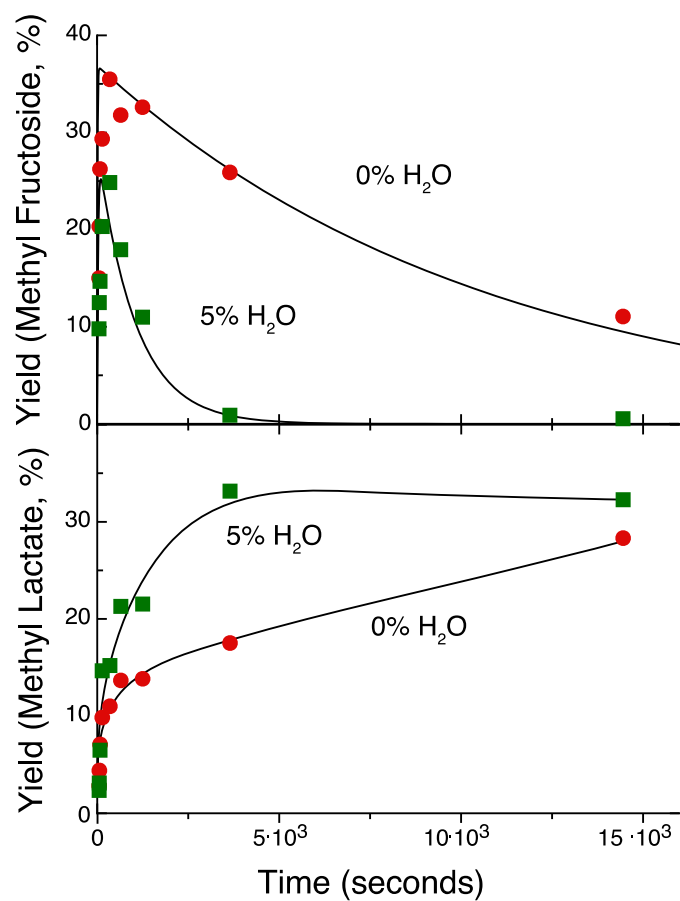

**Fig. S7** Formation of methyl fructoside and methyl lactate using fructose substrate in the absence and in the presence of 5% (v/v) added water. Conditions: 120 mg substrate, 50 mg HT Sn-Beta (150) catalyst, MW reactor for the indicated time at 160 °C with or without addition of 5% water (v/v).
